# Supplementary material for: Changes in gene expression predictably shift and switch genetic interactions
Source: Springer Nature journal article supplement (doi:10.1038/s41467-019-11735-3), 2019-08-29
Supplement: 41467_2019_11735_MOESM1_ESM.pdf [file 41467_2019_11735_MOESM1_ESM.pdf]

## Supplementary Information

Changes in gene expression predictably shift and  
switch genetic interactions

Li et al.

## Dropped oligo library

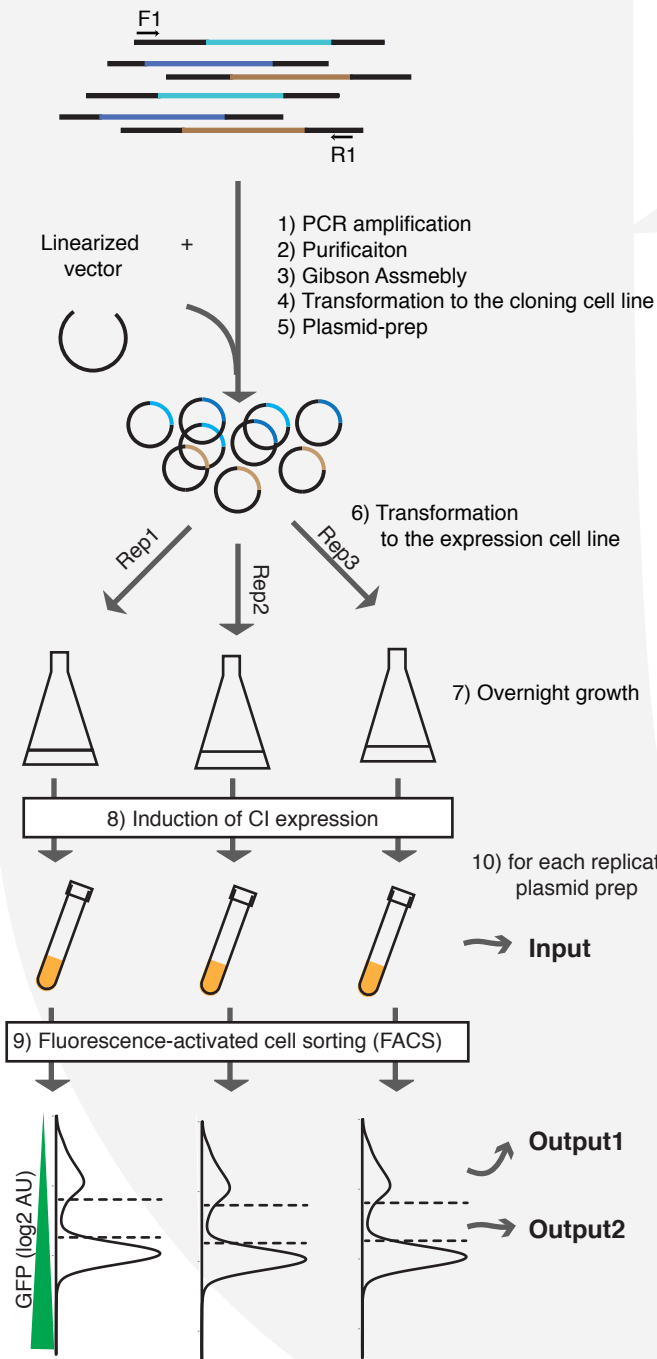

## 17) Relative enrichment scores to GFP

$$\log_2(GFP_{v_i}) = \alpha + \beta \times relE_{v_{j=1,i}} + \gamma \times relE_{v_{j=2,i}}$$

$\alpha$   $\beta$   $\gamma$  : Parameters determined using individually tested reference dataset

16)  $\uparrow$  Filter  
by standard error ( $rel\hat{E}_{v_{j,i}}$ ) < 1

$$15) \quad relE_{v_{j,i}} = E_{v_{j,i}} - E_{wt_{j,i}} \quad wt: \text{wile type variant}$$

$\uparrow$  relE: Relative enrichment scores

## 14) Read counts to enrichment scores

v: variant  
j: {1,2} Output  
C: Count  
E: Enrichment scores  
i: {1,2,3} Replicate

$$E_{v_{j,i}} = \log_2 \left( \frac{C_{v_{j,i}} + 0.5}{C_{v_{Input,i}} + 0.5} \right)$$

$\uparrow$  13) Filter  
by input raw count  $C_{v, input} \geq 100$

Supplementary Figure 1. Experimental pipeline.

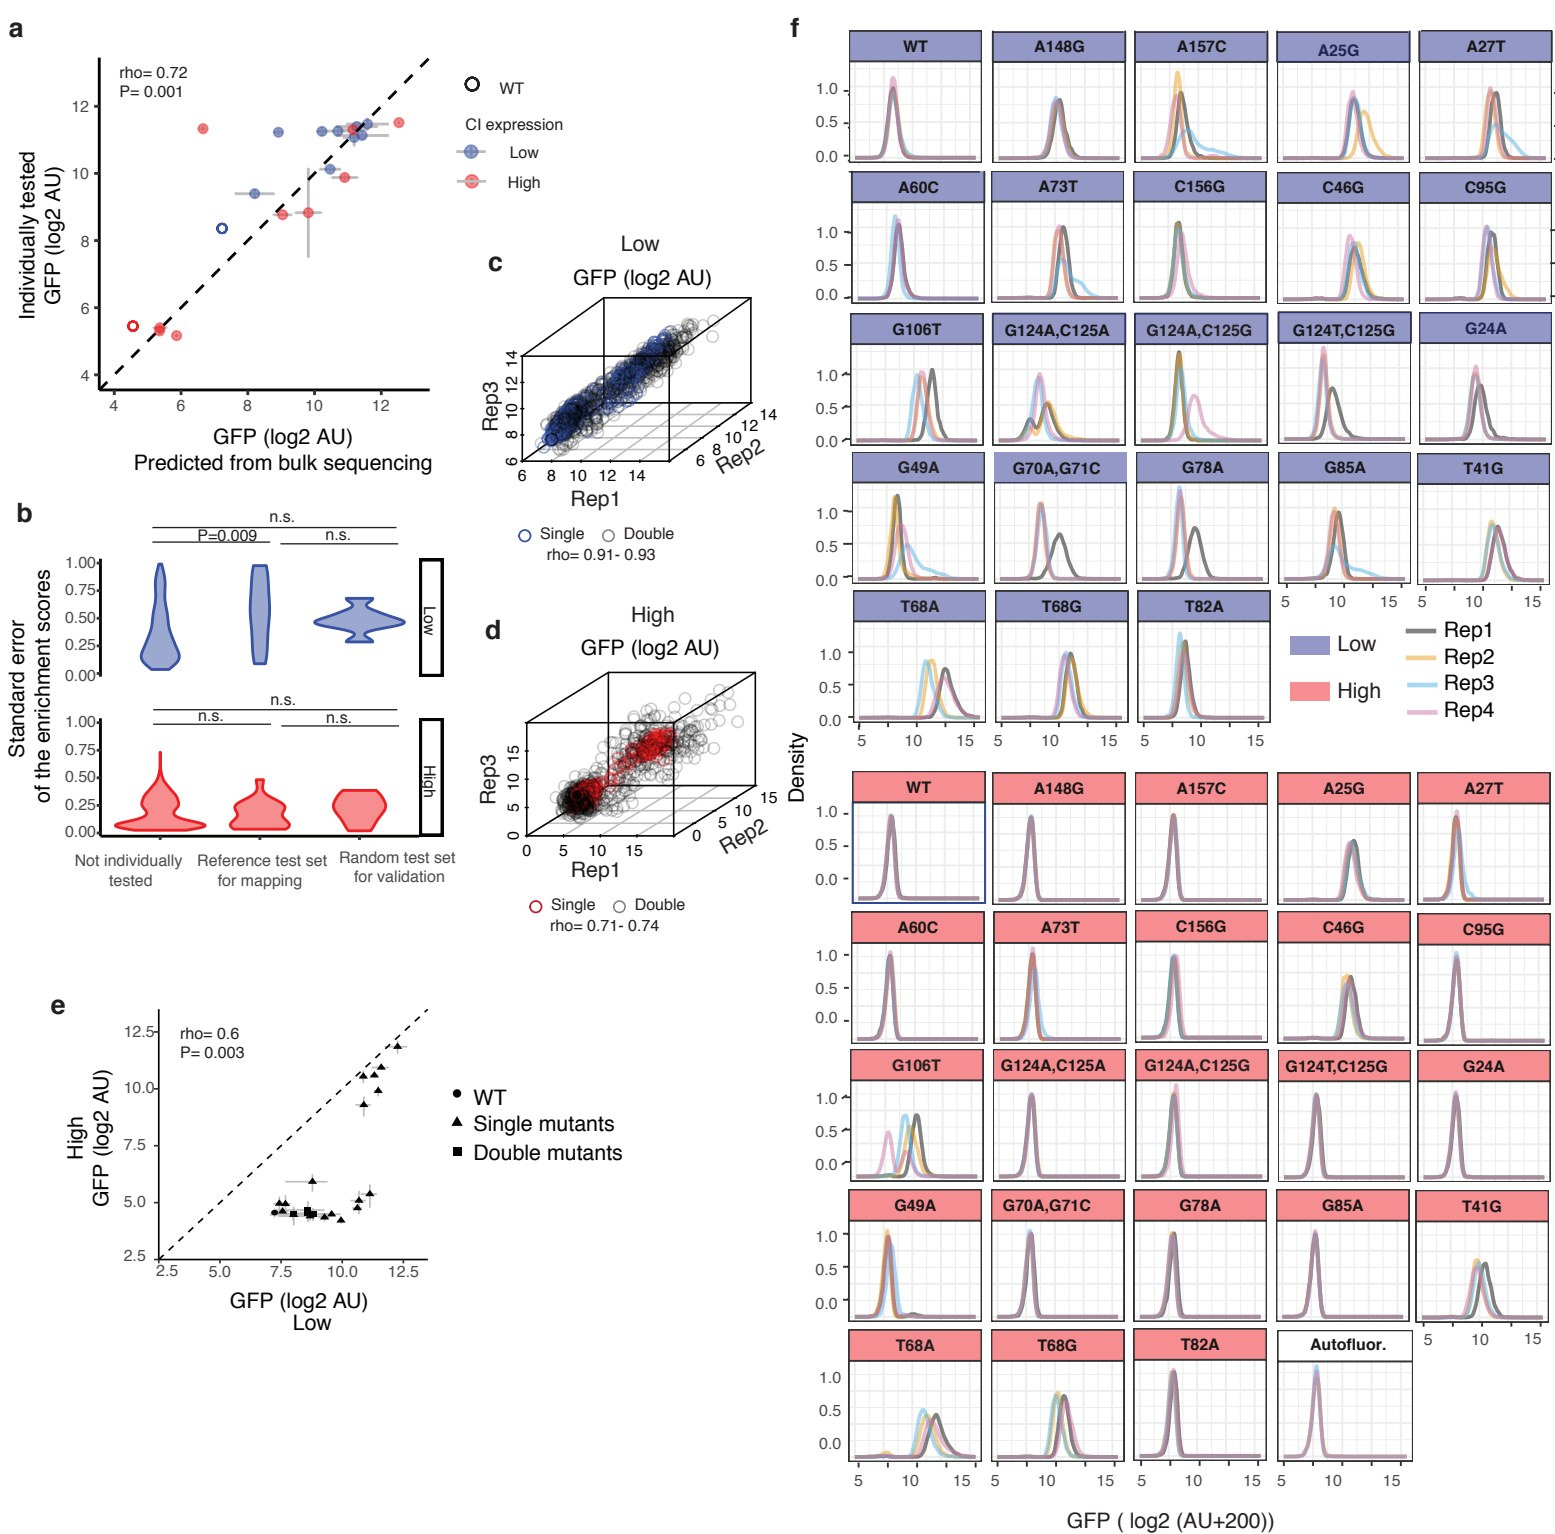

### Supplementary Figure 2. Reproducibility of mutational effects between biological replicates.

- (a) Correlation of target gene expression estimated by deep sequencing, with target gene expression individually quantified for a second validation dataset of 9 single and double mutants at low and high expression levels together with wild type. Error bars denote standard error of the mean from three biological replicates.
- (b) Violin plots of the standard error for enrichment scores from sequencing data for the analysed datasets ( $n=1182$ ), reference dataset as shown in Figure 1d ( $n=22$ , excluding wild type variant) and the independent validation dataset as shown in the panel (a) ( $n=9$ ). Groups compared using Kruskal-Wallis test with post hoc Dunn's test.
- (c and d) Spearman correlations of mutational effects among three biological replicates for low (c) and high (d) CI expression.
- (e) Comparisons of mutational effects between low and high expression level for 22 individually retested single and double mutants together with wild type. Error bars denote standard error of the mean.
- (f) Density plots of GFP expression for the 22 individually re-tested single and double mutants at the two expression levels of CI.

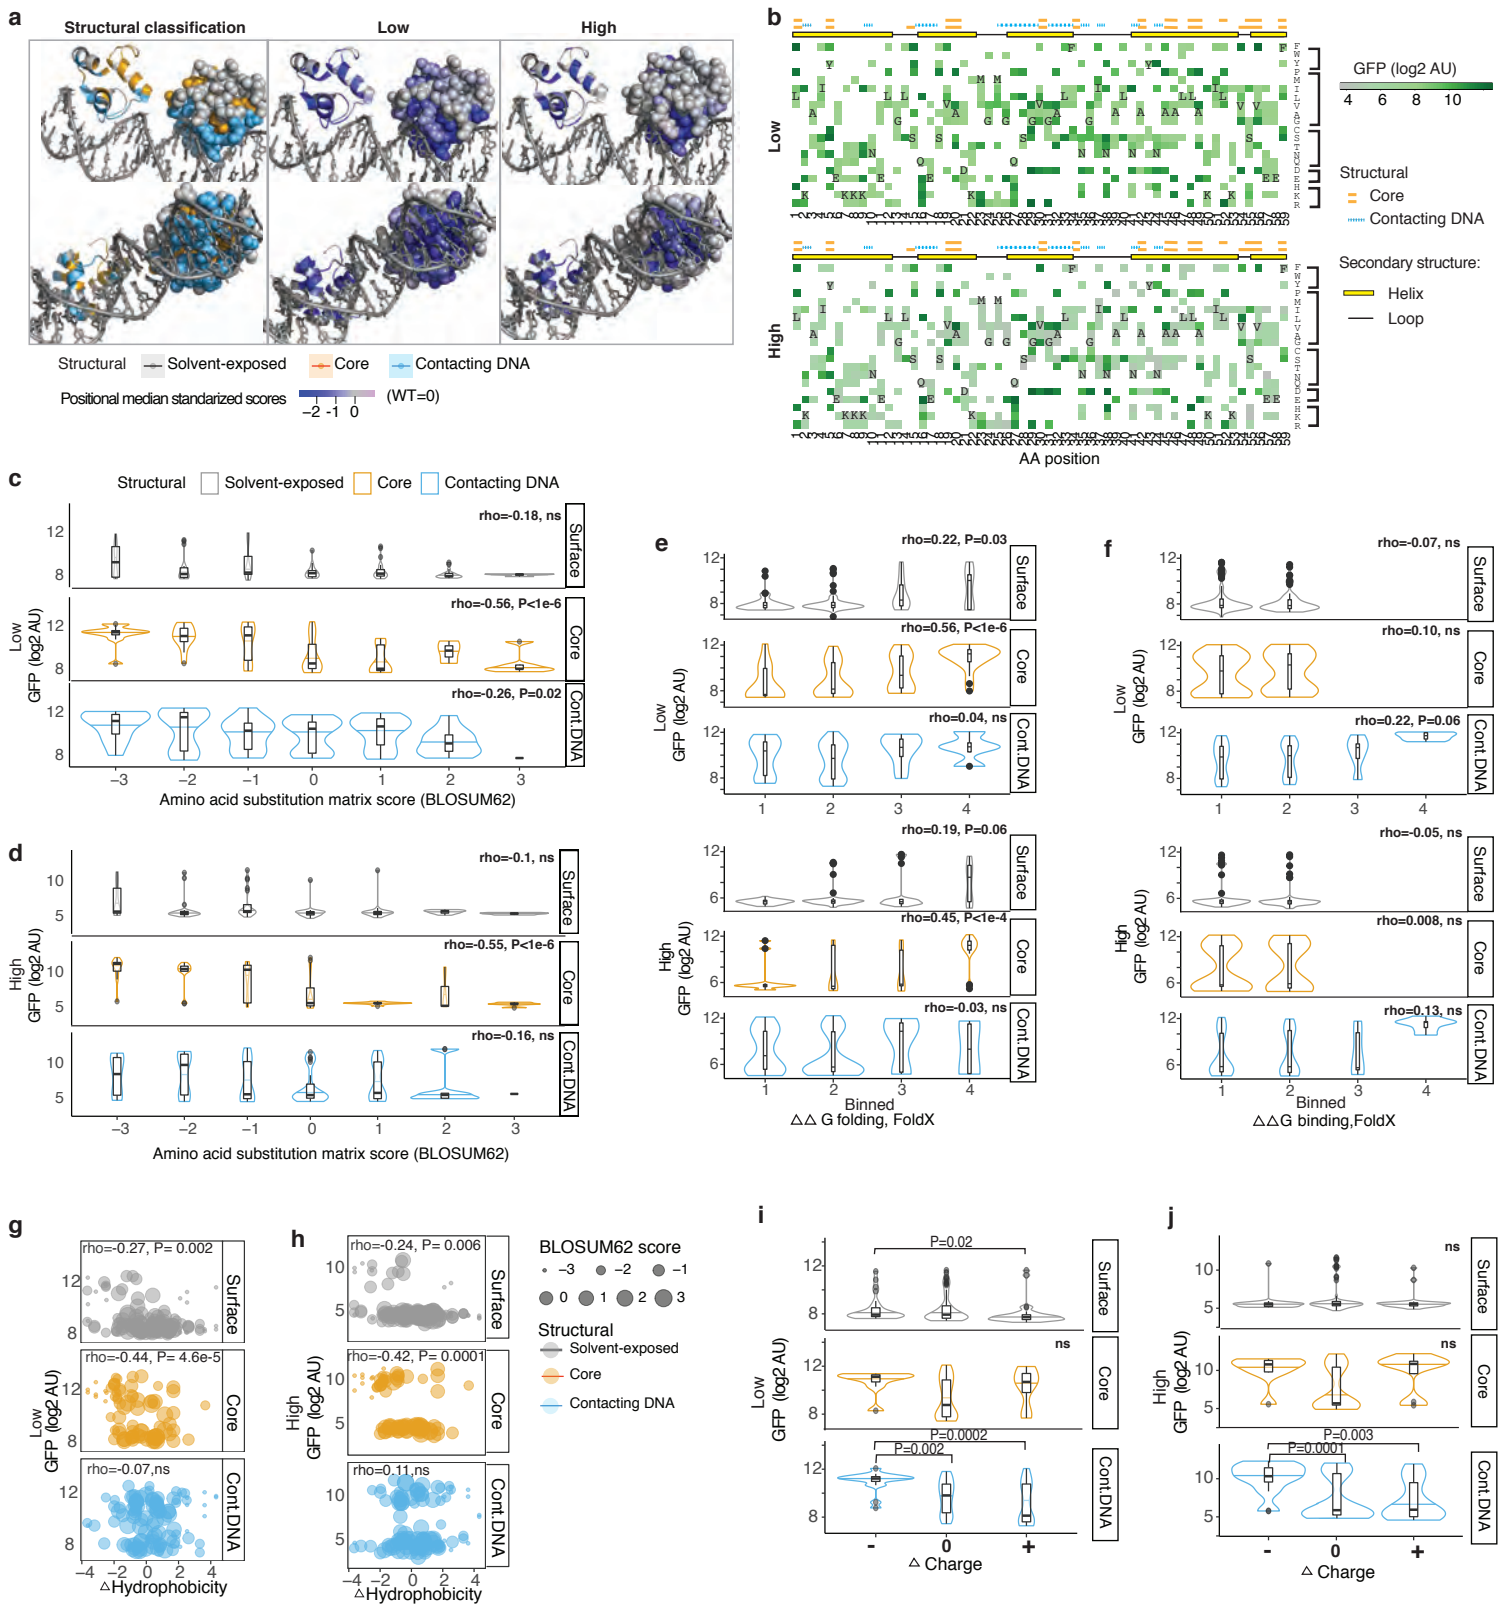

**Supplementary Figure 3. Mutational effects depend on both the chemical features of amino acid substitutions and the tertiary structural positions.**

(a) Structure of CI dimer bound to an operator (PDB 3bdn). One monomer is shown as a ribbon and the other one with all its atoms shown as spheres. Only the mutagenized HTH domain is shown. Left panel is the structural classification of the residues. Middle and right panels show the positional median z-scores of GFP expression levels after subtracting wild type z-scores at the two expression levels of CI. Z-scores rather than absolute GFP expression levels are shown here to compare positional sensitivity to mutations at two expressions of CI. (b) Heatmaps of mean GFP expression for single mutations at the two expression levels. Amino acids are ordered based on their similarities, from top to bottom: hydrophobic aromatic (F,W,Y), hydrophobic nonpolar aliphatic (P,M,I,L,V,A,G), hydrophilic polar uncharged (C,S,T,N,Q), hydrophilic negatively charged (D,E) and hydrophilic positively charged (H,K,R). Wild type amino acids are shown as letters inside the heatmap. (c and d) Target GFP expression compared to the amino acid substitution matrix scores (BLOSUM62) at low (c) and high (d) expression of CI. (e and f) Target GFP expression compared to the binned FoldX-predicted changes in the folding energy of the protein (e) and protein-DNA binding (f) at the two expression levels. Bin1 corresponds to  $\Delta\Delta G \leq 0$ ; Bin2:  $0 < \Delta\Delta G \leq 2.5$ ; Bin3:  $2.5 < \Delta\Delta G \leq 5$ ; and Bin4:  $\Delta\Delta G > 5$ . (g and h) Target gene expression compared to the change in the hydrophobicity at low (g) and high (h) expression of CI. (i and j) Target gene expression compared to changes in the side chain charges at low (i) and high (j) expression of CI. Classes compared using Kruskal-Wallis test with post hoc Dunn's test. All P-values were Bonferroni adjusted.

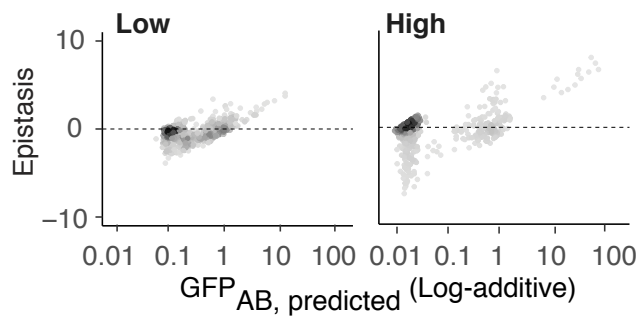

**Supplementary Figure 4. Epistasis versus GFP expression levels for observed data.**

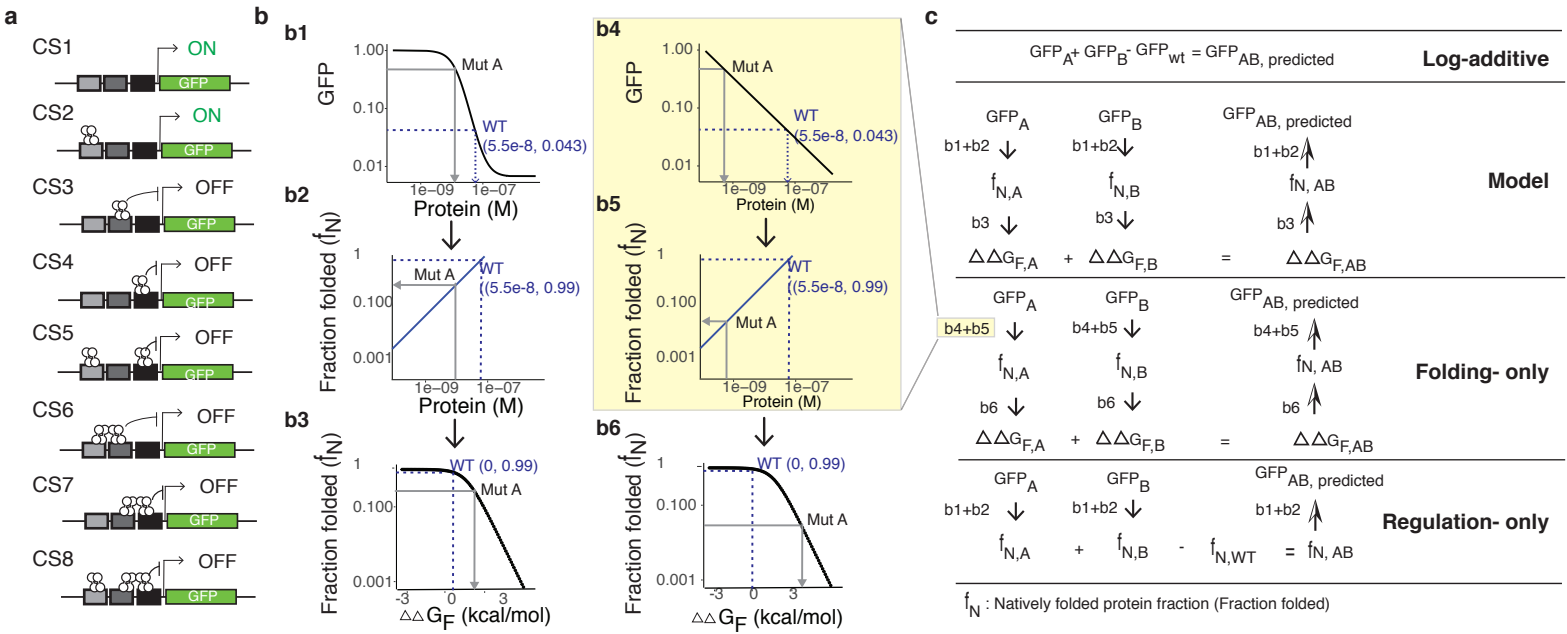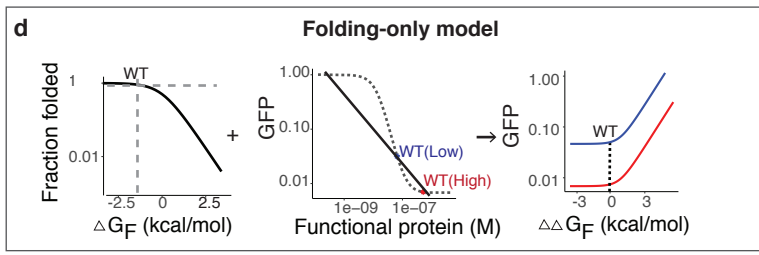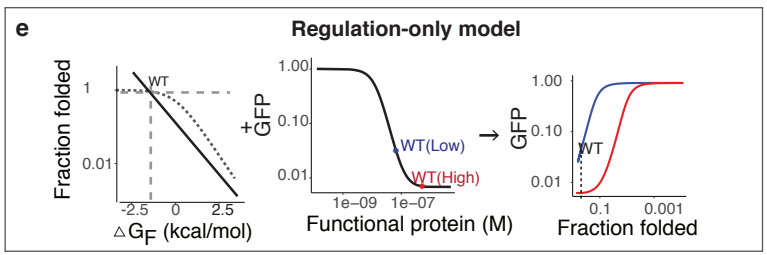

**Supplementary Figure 5. Mathematical models.**  
 (a) Eight configuration states (CS) of the PR promoter. (b) Obtaining functional protein concentration (panels b1,b4), fraction of folded protein (panels b2,b3), and change in folding energy (panels b2,b3) from GFP expression levels of a mutation at low expression of the protein. (c) Scheme for predicting double mutants' GFP expression levels from single mutants' GFP expression levels based on different models. (d) Folding-only model. (e) Regulation-only model.

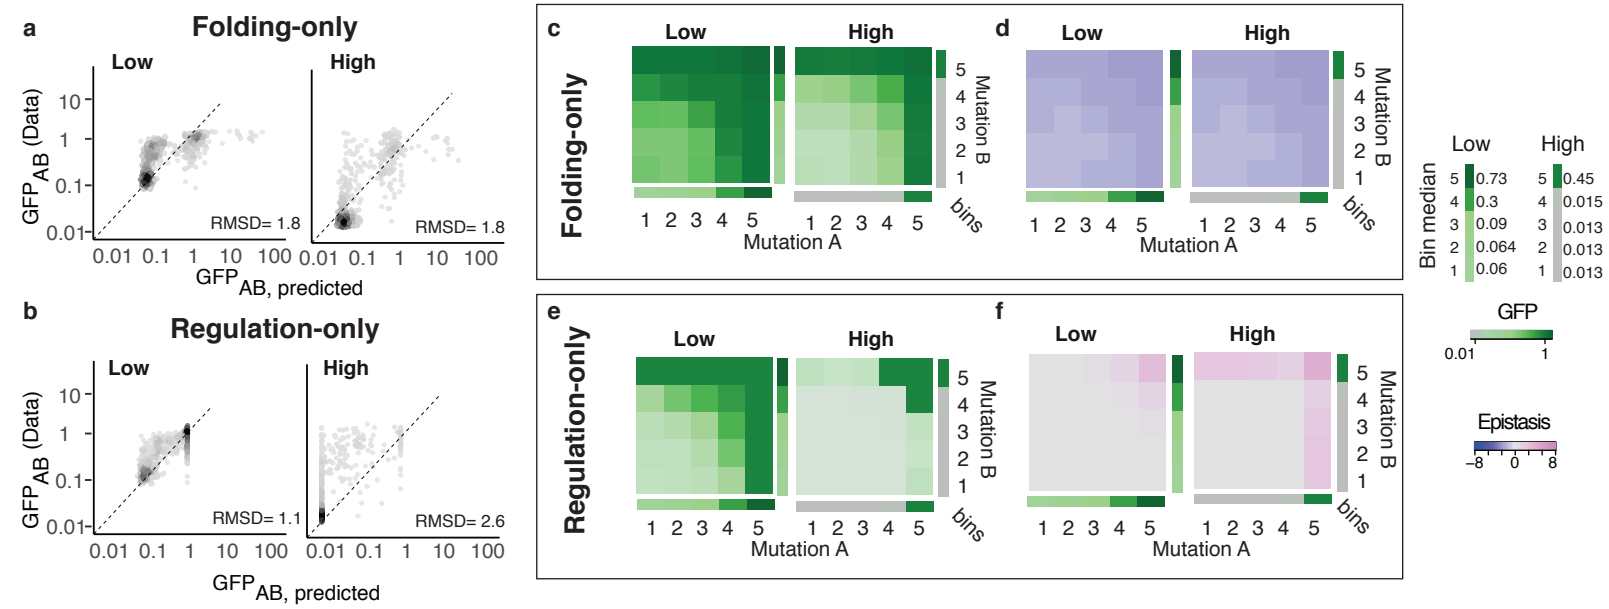

**Supplementary Figure 6. Predictions of double mutants based on folding-only or regulation-only model.**

(a and b) Observed versus predicted GFP expression levels for the folding-only (a) and regulation-only (b) models. RMSD: root-mean-square-deviation from the predicted to the observed data. (c – f) Binned median target gene expression levels (c, e) and epistasis scores (d, f) for the folding-only (c, d) and regulation-only (e, f) models. Mutations were sorted into 5 equally populated bins by their single mutant phenotypes as in Figure 3j,k.

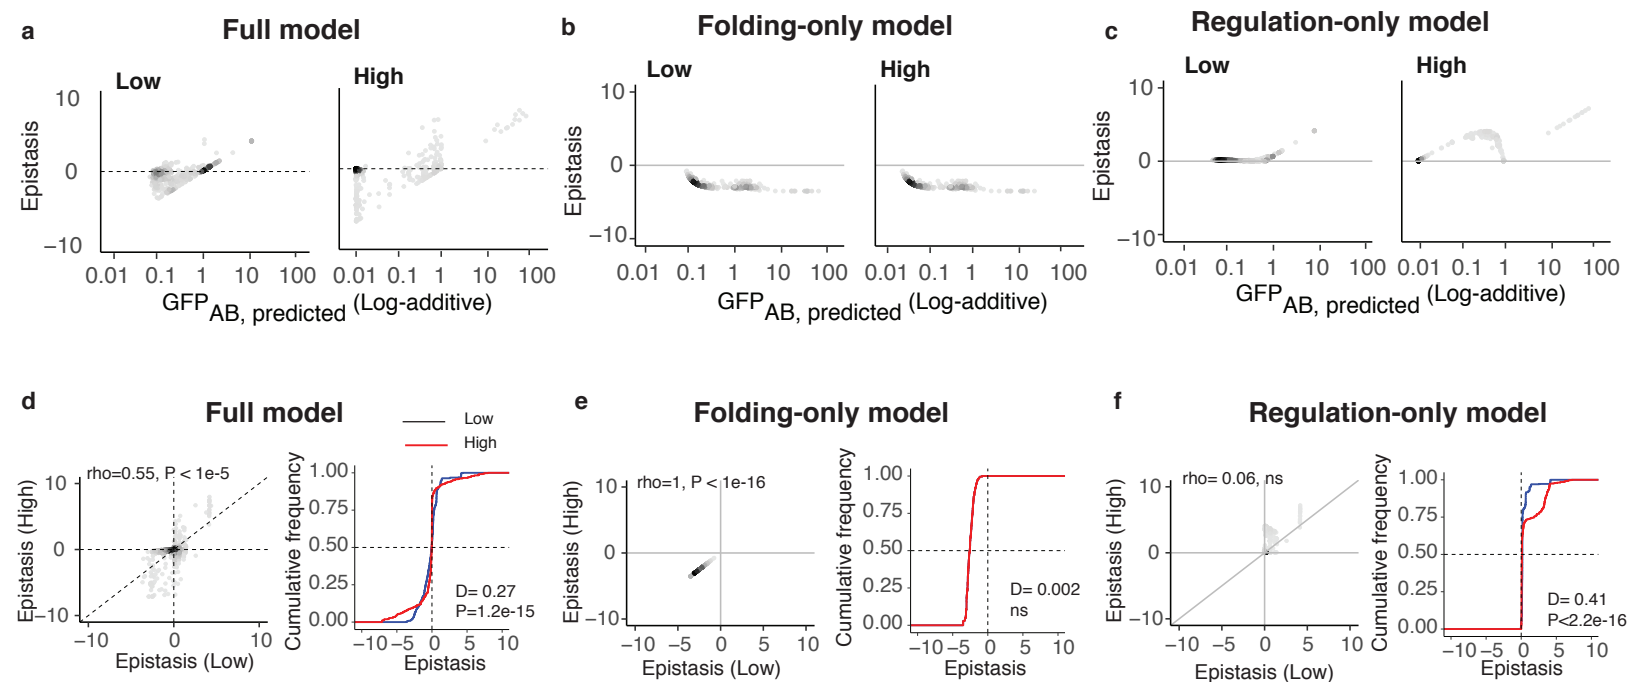

**Supplementary Figure 7. Epistasis pattern predicted from different models.**

(a – c) Epistasis versus GFP expression levels predicted from full model (a), folding-only model (b) and regulation-only model (c). (d – f) Epistasis scores at the two expression levels of CI protein for full model (d), folding-only model (e) and regulation-only model (f). Two-sample Kolmogorov–Smirnov test was performed for cumulative distributions of epistasis scores at the two expression levels of CI protein.



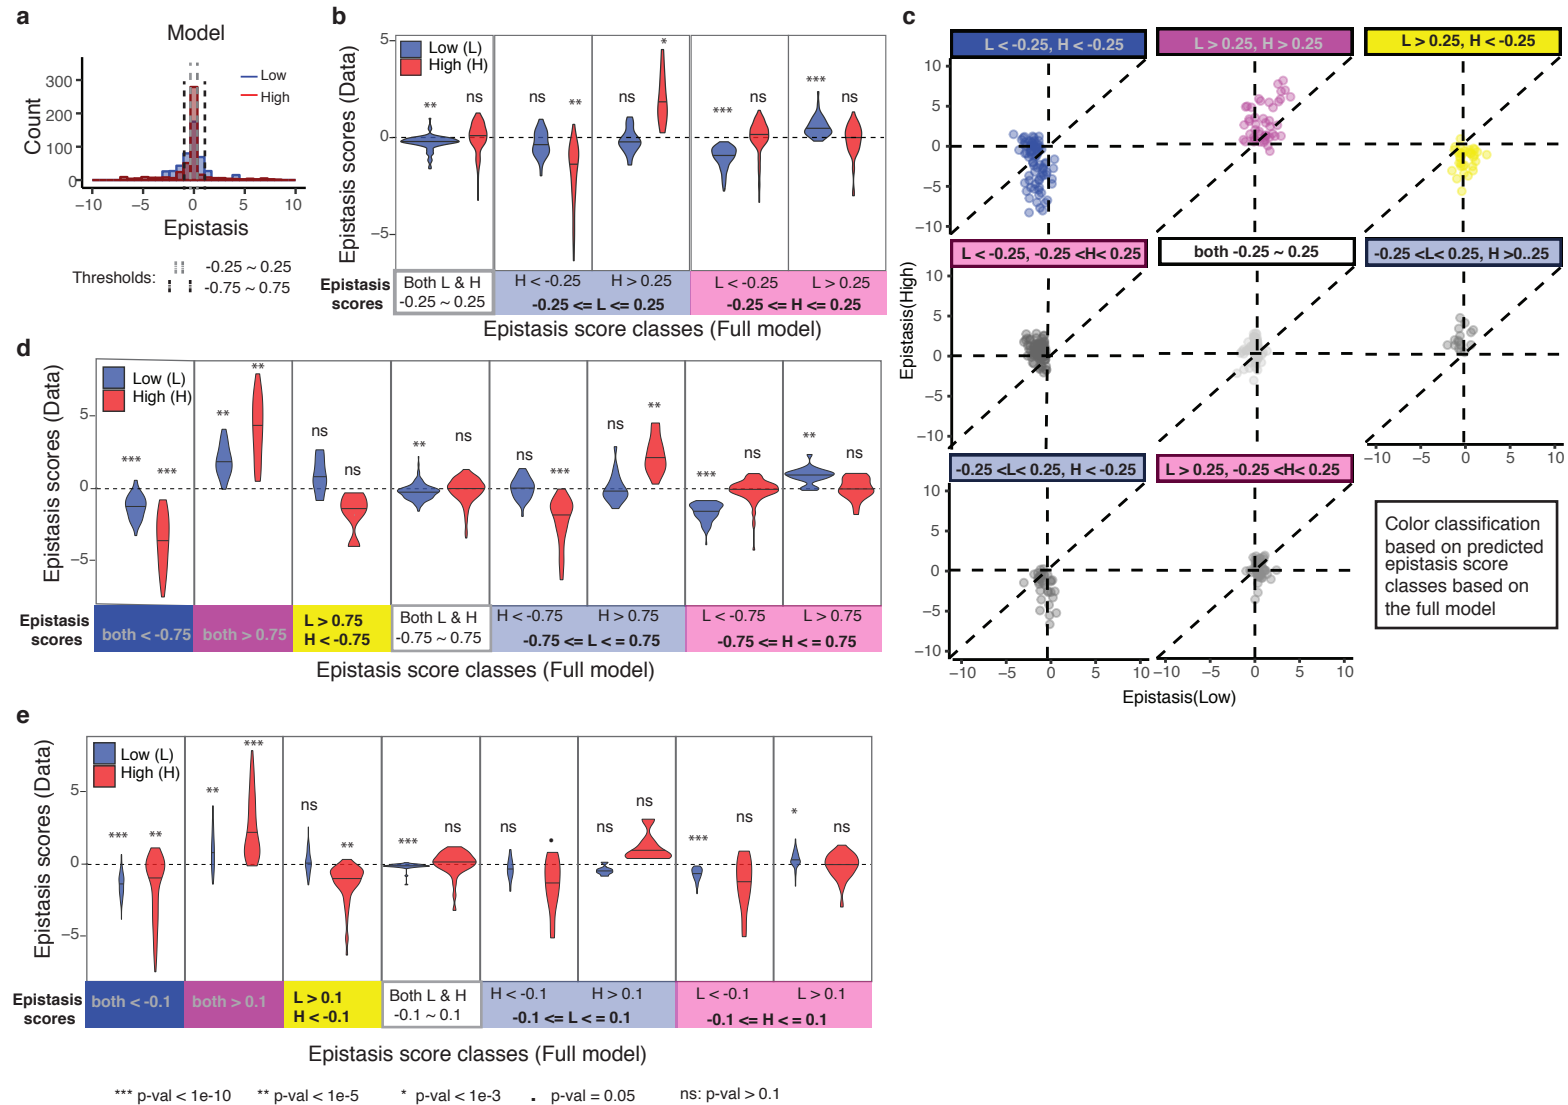

**Supplementary Figure 8. Observed versus predicted expression level-dependent changes in epistasis.**

(a) Histogram of the model-predicted epistasis score distributions at the two expression levels of the protein. The grey dotted lines mark the centre bin with the epistasis score thresholds of -0.25 and 0.25; and the black dotted lines mark the centre three bins with the epistasis score thresholds of -0.75 and 0.75. (b and c) Distribution of the observed epistasis scores grouped by the model-predicted classes of epistasis scores, with classification threshold of -0.25 and 0.25. (d and e) Distribution of the observed epistasis scores grouped by the model-predicted classes of epistasis scores, with two additional classification thresholds, between -0.75 and 0.75 (d) and between -0.1 and 0.1 (e). “L” - low expression and “H” - high expression. The one-sample Wilcoxon signed rank test was performed to test whether average epistasis scores are significantly different from 0. P-values are adjusted with Bonferroni multiple test correction method.

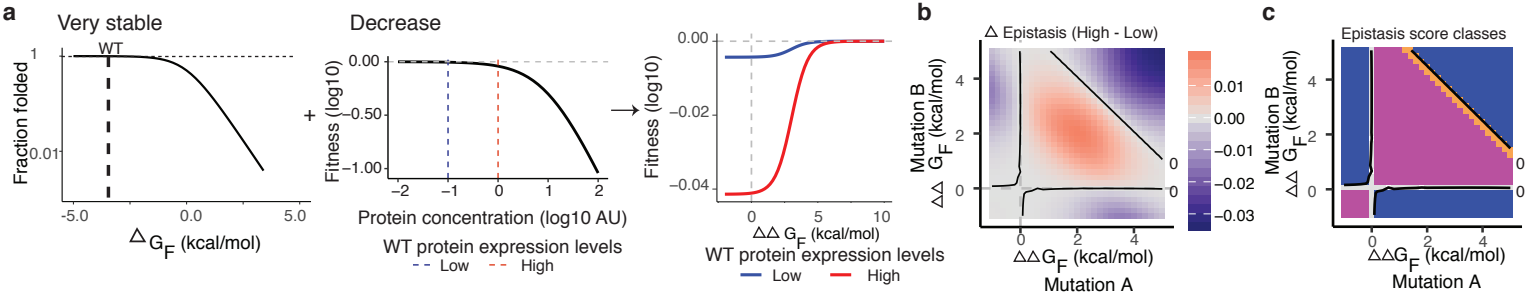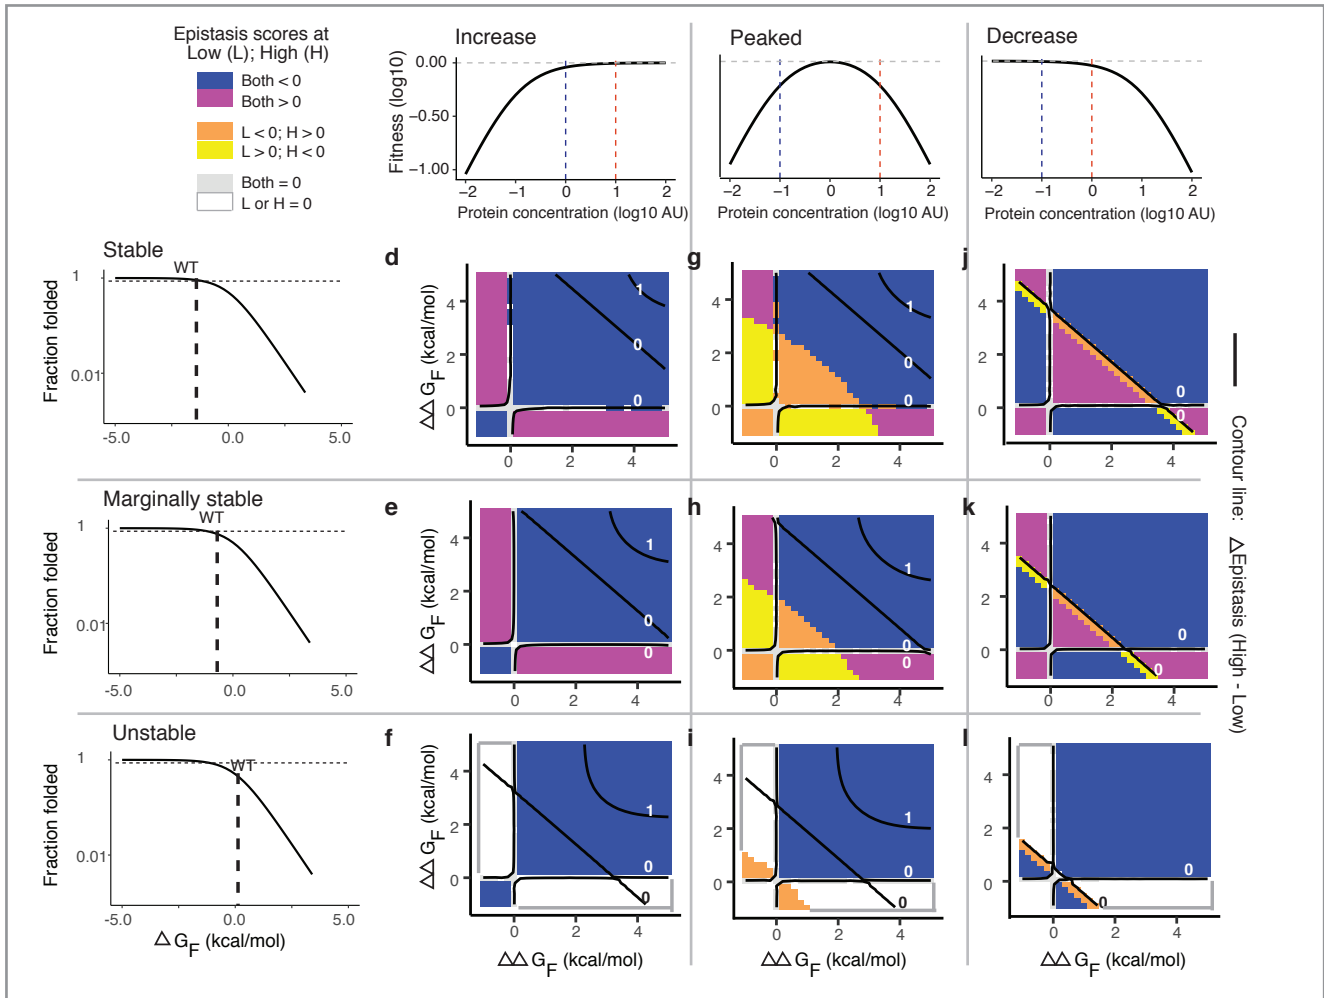

**Supplementary Figure 9. Concentration-dependent genetic interactions in the yeast fitness landscape.**

(a – c) Concentration-dependent mutation effects and epistasis in a “decreasing” expression-fitness function<sup>54</sup>. (d – l) Concentration-dependent epistasis for three common expression-fitness functions with stable, marginally stable and unstable proteins.



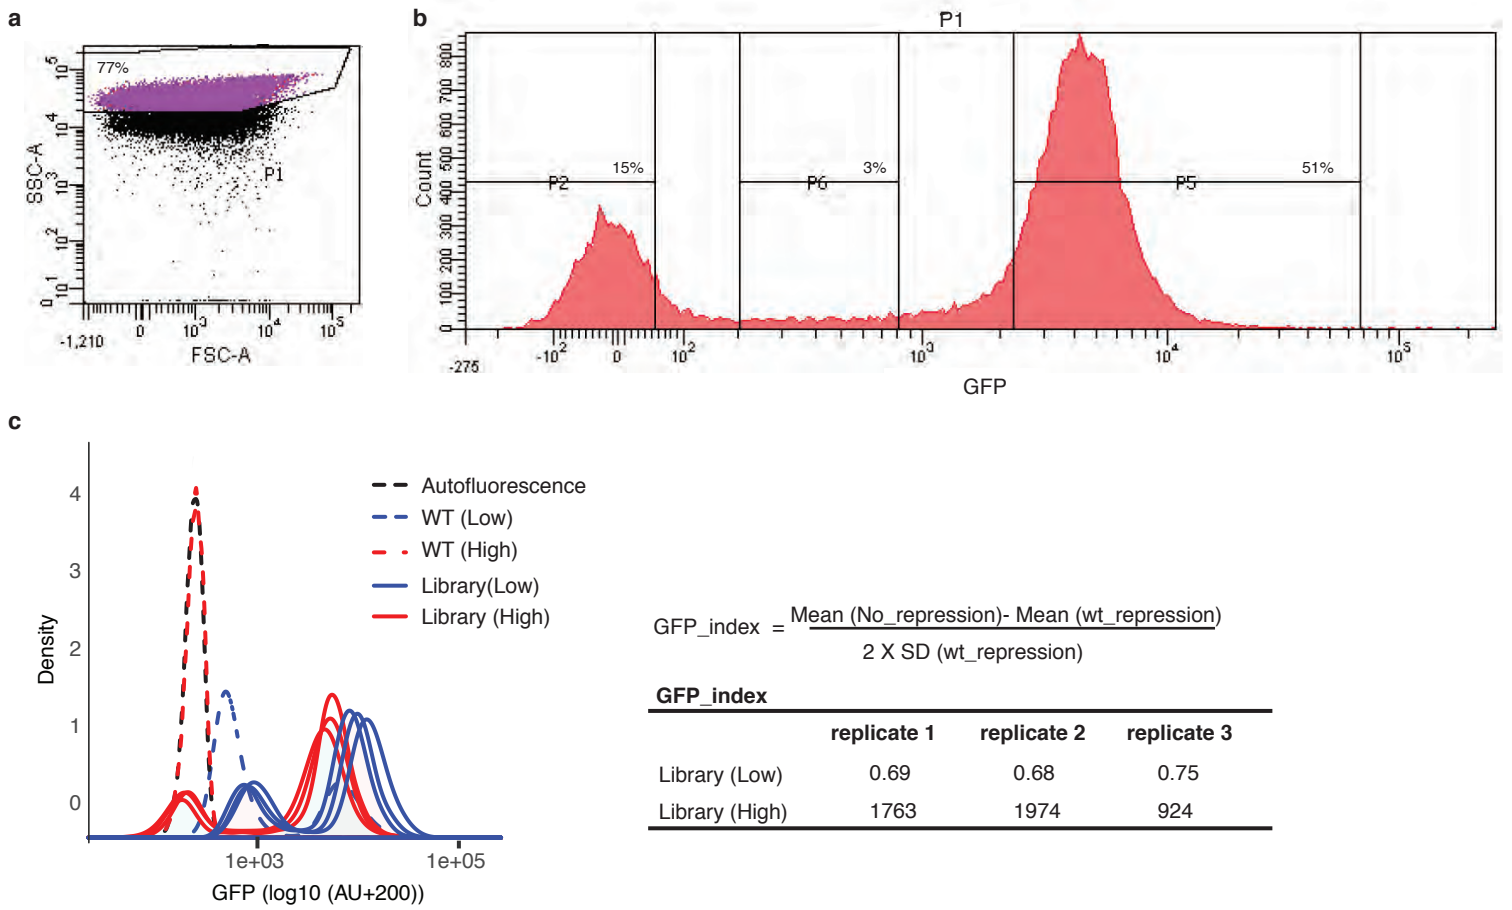

**Supplementary Figure 11. Fluorescence-activated cell sorting (FACS).**

(a and b) An example (High expression, replicate 3) of the gating strategy for FACS. Gate P2 and P6 correspond to Output 1 and Output 2 in Figure 1c respectively. (c) FACS recordings from each biological replicate performed on different days. GFP\_index is used to quantify variation in fluorescence readings between batches.

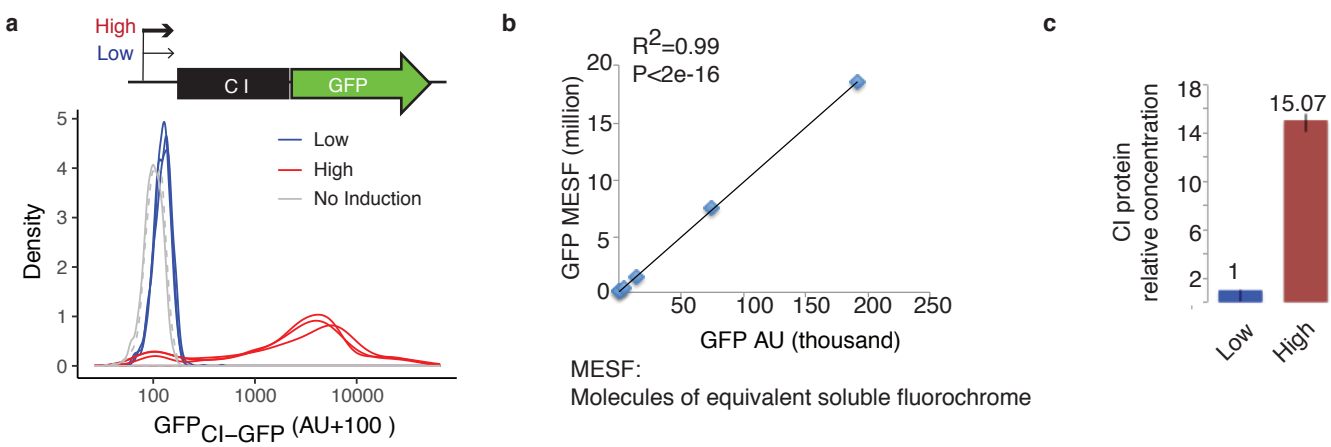

**Supplementary Figure 12. Protein quantification.**

(a) Distribution of fluorescence signal of cells expressing C-terminal GFP-tagged CI at high and low expression levels. (b) Fluorescence linearly correlates with the number of molecules of equivalent soluble fluorochrome (MESF) from GFP beads. (c) Relative fold-change of soluble CI protein concentrations at high versus low expression levels. Error bars denote standard error of the mean.

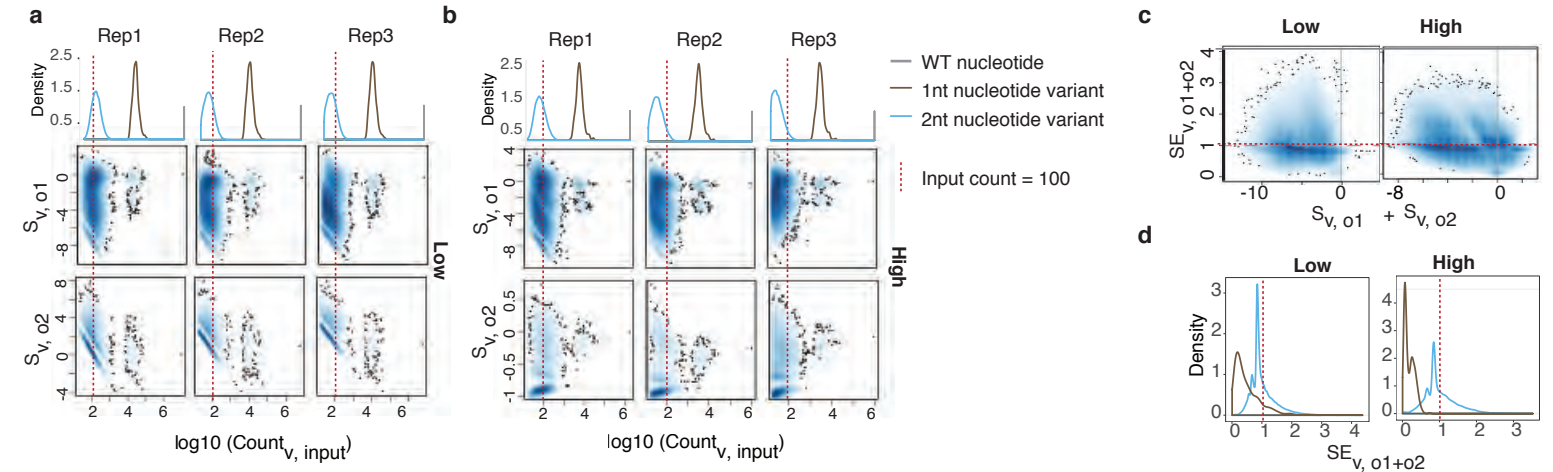

### Supplementary Figure 13. Filtering of sequencing data.

(a and b) Sequencing data was filtered to only retain genotypes with at least 100 read counts (red line) in all three biological replicates for both low (a) and high (b) expression datasets. Each smooth scatter panel shows the relationship between enrichment scores ( $S_{v, o1}$  for Output1 and  $S_{v, o2}$  for Output2) and input read counts for each replicate. The top density plot shows the input count distribution for each replicate. (c and d) Only variants with propagated mean enrichment score standard errors smaller than 1 (red line) were retained.

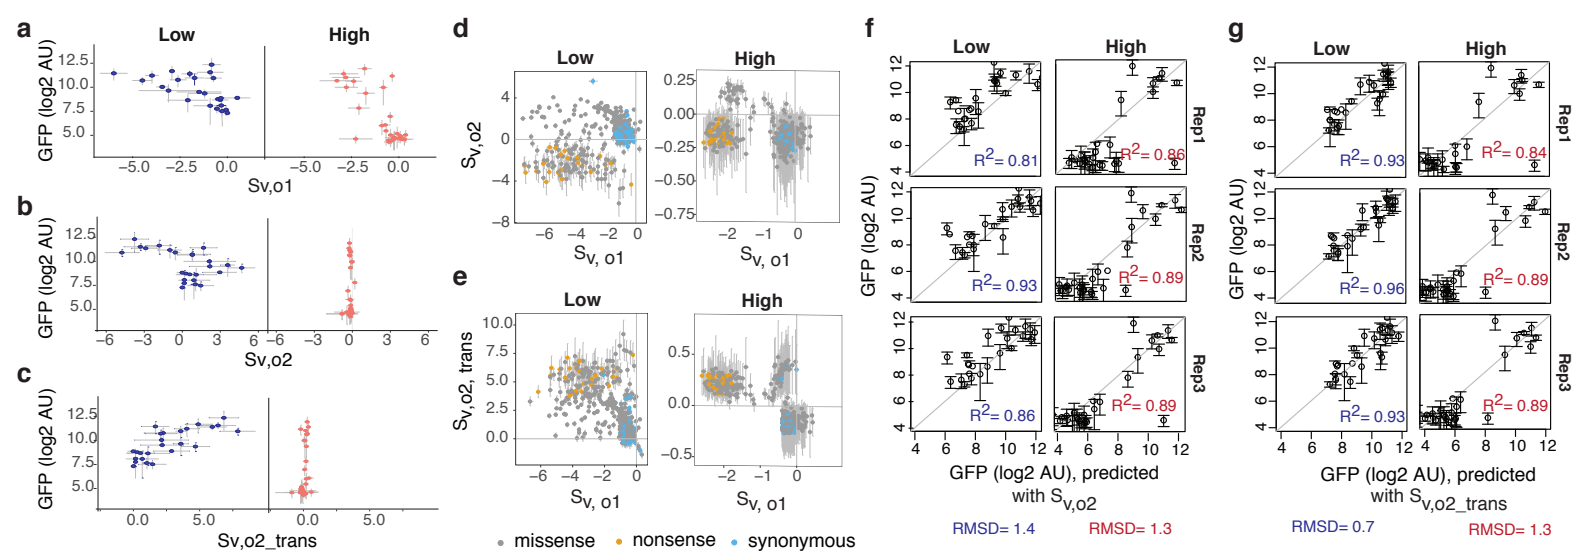

**Supplementary Figure 14. Converting enrichment scores to GFP expression.**

(a – c) Relationship between GFP signals either with Output1 enrichment scores (a), with Output2 enrichment scores (b), or with transformed Output2 enrichment scores (c) for the individually tested variants ( $n=23$ ). (d and e) Relationship between Output1 and Output2 enrichment scores (d) or transformed Output2 enrichment scores (e) for all single nucleotide variants ( $n=531$ ). (f and g) Comparisons of individually tested mean GFP signals with the predicted mean GFP signals from Output1 and Output2 enrichment scores (f) or with Output1 and transformed Output2 enrichment scores (g) ( $n=23$ ). All error bars denote standard error of the mean. RMSD: root-mean-square-deviation between the predicted and observed data, after averaging the replicates.

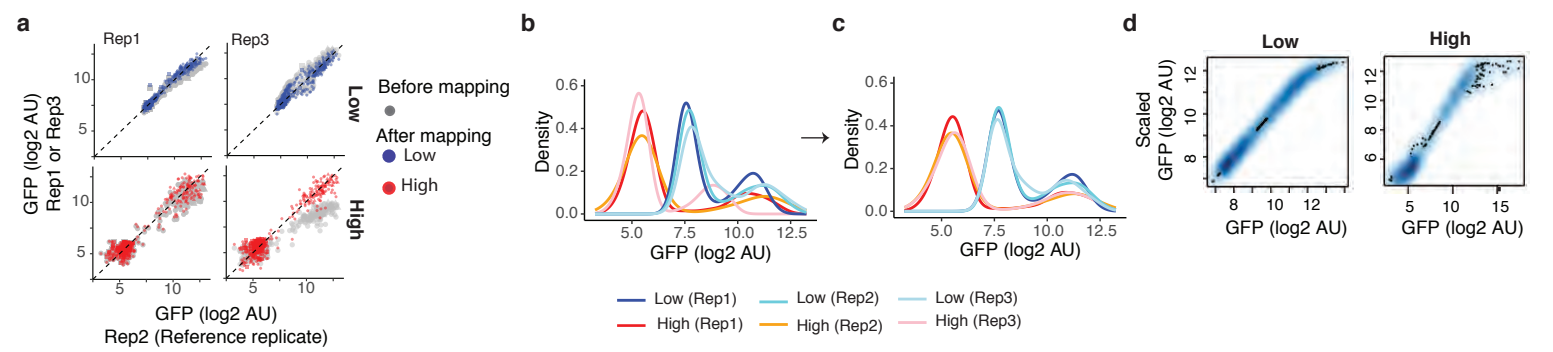

### Supplementary Figure 15. Correcting for technical biases.

(a) Relationship between predicted GFP expression for biological replicates for all single nucleotide variants ( $n=531$ ) before (grey) and after (blue or red) transforming the replicate 1 and 3 data to the reference replicate 2 (see Methods). (b and c) Density plot of GFP expression before (b) and after (c) correcting for technical biases by transforming replicates 1 and 3 to the reference replicate 2 for all single nucleotide variants ( $n=531$ ). (d) Smooth scatter showing the relationship between the mean GFP signal of all amino acid genotypes ( $n=888$ ) before and after scaling to the detection range (see Supplementary Methods).



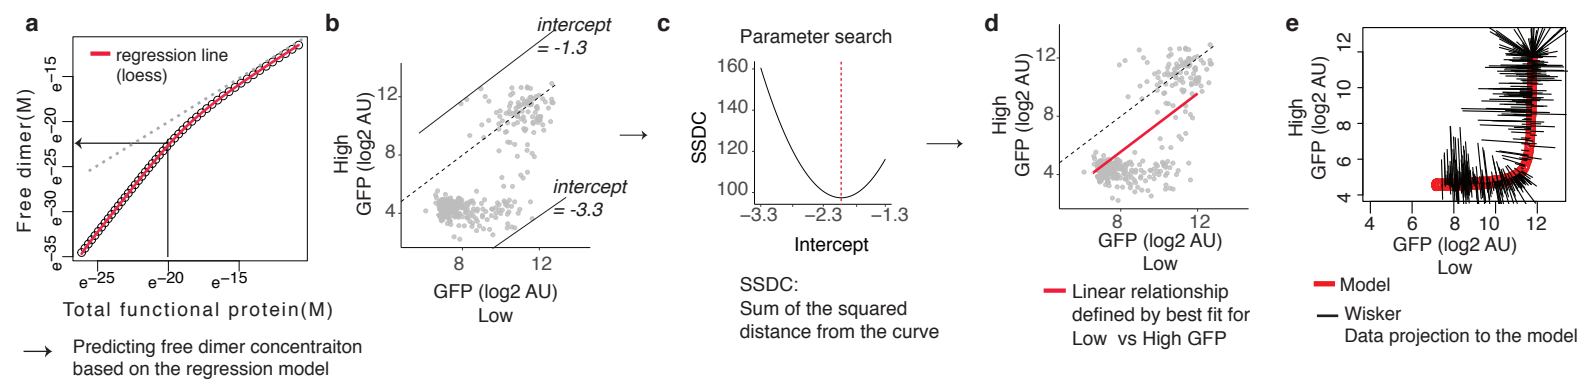

### Supplementary Figure 16. Mathematical modelling.

(a) Relationship between free CI dimer concentration and total CI concentration in the cell in Ackers' model. (b – d) Parameter search for the line intercept that best describes the relationship of GFP at low and high expression for the folding-only model. Dashed lines in (b) and (d) mark equal GFP level at the two expression levels. Solid lines in (b) mark the range of the intercepts searched for the best fit. Red dashed line in (c) shows the best fit (the smallest SSDC). (e) Projection of individual data points from observed GFP expression levels at low and high CI expression to the model-predicted curve.

**Supplementary Table 1. PCR primers**

|               | <b>F: Forward; R: Reverse, 5' to 3'</b> | <b>Note</b>                                          |
|---------------|-----------------------------------------|------------------------------------------------------|
| d-CIF         | ACACAAGAGCAGCTTGAGGA                    |                                                      |
| d-CIR         | ATTTCTCTGGCGATTGAAGG                    | "doped" library amplification                        |
| pBAD-cl-F     | TCCTCAAGCTGCTCTTGTGT                    |                                                      |
| pBAD-cl-R     | CCTTCAATCGCCAGAGAAAT                    | For Gibson Assemble Cl to the backbone               |
| Q5SDM_CIF     | ATGAGCACAAAAAGAAACC                     |                                                      |
| Q5SDM_CIR     | GGTTAAATTCCTCCTGTTAG                    | Changing 5prime UTR for expression of Cl             |
| Cl_GFP_fuse_F | GCTGGTTCTGGCGAATTCATGCGTAAAGGCGAAGAAC   |                                                      |
| Cl_GFP_fuse_R | AGCGGAGCCAGCGGATCCGCCAACGTCCTCTTCAGG    | Making Cl-GFP fusion for protein quantification      |
| colony-F1     | GGCGTCACACTTTGCTATGC                    |                                                      |
| colony-R1     | ACAGTTCTTCGCCTTTACGC                    | For colony PCR                                       |
| dCl_F_s       | GCTTGAGGACGCACGTC                       |                                                      |
| dCl_R_s       | TCTGGCGATTGAAGGGCT                      | "doped" library amplification for sequencing library |
| d_Cl_Fs_1     | GAACGTTGCTTGAGGACGCACGTC                |                                                      |
| d_Cl_Rs_1     | GAACGTTCTCTGGCGATTGAAGGGCT              | Input.rep1.barcoded                                  |
| d_Cl_Fs_2     | GCCGAATTGCTTGAGGACGCACGTC               |                                                      |
| d_Cl_Rs_2     | GCCGAATTTCTGGCGATTGAAGGGCT              | Input.rep2.barcoded                                  |
| d_Cl_Fs_3     | CGGCAATTGCTTGAGGACGCACGTC               |                                                      |
| d_Cl_Rs_3     | CGGCAATTTCTGGCGATTGAAGGGCT              | Input.rep3.barcoded                                  |
| d_Cl_Fs_4     | GCGCATATGCTTGAGGACGCACGTC               |                                                      |
| d_Cl_Rs_4     | GCGCATATTCTGGCGATTGAAGGGCT              | Output1 &2.rep1.barcoded                             |
| d_Cl_Fs_5     | CAACCATGGCTTGAGGACGCACGTC               |                                                      |
| d_Cl_Rs_5     | CAACCATGTCTGGCGATTGAAGGGCT              | Output1 &2.rep2.barcoded                             |
| d_Cl_Fs_6     | CGTACCTTGCTTGAGGACGCACGTC               |                                                      |
| d_Cl_Rs_6     | CGTACCTTTCTGGCGATTGAAGGGCT              | Output1 &2.rep3.barcoded                             |
| Q5SDM1_F      | TTGATGCCATTAATAAAGCAC                   |                                                      |
| Q5SDM1.1_R    | TGCATTAATcaTTATAACGCCGATTG              | G124T,C125G                                          |
| Q5SDM1_F      | TTGATGCCATTAATAAAGCAC                   |                                                      |
| Q5SDM1.2_R    | TGCATTAATctTTATAACGCCGATTG              | G124A,C125G                                          |
| Q5SDM1_F      | TTGATGCCATTAATAAAGCAC                   |                                                      |
| Q5SDM1.3_R    | TGCATTAATttTTATAACGCCGATTG              | G124A,C125A                                          |
| Q5SDM4_F      | AGACAAGATGacGATGGGGCAGTC                |                                                      |
| Q5SDM4_R      | GCGACAGATTCTGGGAT                       | G70A,G71C                                            |
| Q5SDM5_F      | AGGAATCTGTGCGcGACAAGATGGGGA             |                                                      |
| Q5SDM5_R      | TCCCCATCTGTGCGGcGACAGATTCT              | A60C (synonymous)                                    |
| Q5SDM6_F      | GCAATTTATGAAAAAaAAAAATGAACCTGGCTT       |                                                      |
| Q5SDM6_R      | AAGCCAAGTTcATTTTTTTTTTTCATAAATTG        | G78A (synonymous)                                    |
| Q5SDM7_F      | CTTGCAAAAAATCTgAAAGTTAGCGTTGAAGAATTTAGC |                                                      |
| Q5SDM7_R      | GCTAAATCTTCAACGCTAACTTTCAGAATTTTGCAAG   | C156G(synonymous)                                    |
| Q5SDM8_F      | AAATGAACTTGGCTgATCCcAGGAATCTGTGCG       |                                                      |
| Q5SDM8_R      | CGACAGATTCTGGGATcAGCCAAAGTTcATTT        | T41G (nonsense)                                      |
| Q5SDM9_F      | CTTATCCcAGaAATCTGTGCG                   |                                                      |
| Q5SDM9_R      | CCAAGTTcATTTTTCTTTTTTTC                 | G49A                                                 |
| Q5SDM10_F     | GCAATTTATGAAAAAaAAAAATGAACCTGGCTT       |                                                      |
| Q5SDM10_R     | AAGCCAAGTTcATTTTTTTTTTTCATAAATTG        | G24A                                                 |
| Q5SDM11_F     | TCGCAGACAGaGaaGGGGATGGGGCAG             |                                                      |
| Q5SDM11_R     | CTGCCCCATCCcCTTCTGTCTGCGA               | T68A                                                 |
| Q5SDM12_F     | AAAAAAAGAAIAATGAACCTGGCTTATC            |                                                      |
| Q5SDM12_R     | CATAAATTGCTTTAAGCGC                     | A27T                                                 |
| Q5SDM13_F     | TGAAAAAAGGAAATGAACCTGG                  |                                                      |
| Q5SDM13_R     | TAAATTGCTTTAAGCGGAC                     | A25G                                                 |
| Q5SDM14_F     | AAAATTTCTCCAAGTTAGCGTTGAAGAATTTAGC      |                                                      |
| Q5SDM14_R     | GCAAGCAATGCGGCGTTA                      | A157C                                                |
| Q5SDM15_F     | GGCGTTGGTgTTTTAATGCG                    |                                                      |
| Q5SDM15_R     | TGACTGCCcCATCCCAT                       | C95G                                                 |
| Q5SDM16_F     | GGGGCAGTCAaGCGTTGGTGC                   |                                                      |
| Q5SDM16_R     | ATCCCATCTTGTCTGCGACAG                   | G85A                                                 |
| Q5SDM17_F     | ATTGCTTGCAgAAATCTCAAAGTTAG              |                                                      |
| Q5SDM17_R     | GCGGCGTTATAAAGCATTAAATG                 | A148G                                                |
| Q5SDM18_F     | TTTTATTAATGcATCAATGCATTAAATGCTTATAACGCC |                                                      |
| Q5SDM18_R     | GCACCAACGCCTGACTGC                      | G106T                                                |
| Q5SDM19_F     | CAAGATGGGGITGGGGCAGTC                   |                                                      |
| Q5SDM19_R     | TCTGCGACAGATTCTCTGG                     | A73T                                                 |
| Q5SDM20_F     | TGGCTTATCCGAGGAATCTGTC                  |                                                      |
| Q5SDM20_R     | AGTTCAATTTTTTTTTTTCATAAATTG             | C46G                                                 |
| Q5SDM21_F     | GCAGACAAGgGGGGATGGGG                    |                                                      |
| Q5SDM21_R     | GACAGATTCTGGGATAAGCC                    | T68G                                                 |
| Q5SDM22_F     | GATGGGGCAGaCAGCGTTGG                    |                                                      |
| Q5SDM22_R     | CCCATCTGTCTGCGACAG                      | T82A                                                 |
| Q5SDM23_F     | AAAGCAATTTgTAAAAAAGAAAAATGAACCTGGCTTATC |                                                      |
| Q5SDM23_R     | AAGGCGACGTGCGTCTCT                      | A14G                                                 |
| Q5SDM24_F     | CTTTATTTAAaGGCATCAATGCATTAAATGCTTATAACG |                                                      |
| Q5SDM24_R     | CACCAACGCCTGACTGCC                      | T105A                                                |
| Q5SDM25_F     | TGCTTATAAcCaCGCATTGCTTG                 |                                                      |
| Q5SDM25_R     | TTTAATGCATTGATGCCATTAATAAAG             | G133A                                                |
| Q5SDM26_F     | CGTTGAAGAcTTAGCCCTTC                    |                                                      |
| Q5SDM26_R     | CTAACTTTGAGAAATTTTGCAAG                 | T175C                                                |
| Q5SDM27_F     | AGTTAGCGTTaAAGAATTTAGC                  |                                                      |
| Q5SDM27_R     | TTGAGAATTTTGCAAGC                       | G169A                                                |
| Q5SDM28_F     | TATAACGCCGgATTGCTTGCA                   |                                                      |
| Q5SDM28_R     | AGCATTAAATGCATTGATGC                    | C137A                                                |
| Q5SDM29_F     | GCAGACAAGAcGGGGATGGGG                   |                                                      |
| Q5SDM29_R     | GACAGATTCTGGGATAAGCC                    | T68C                                                 |

Lower case letter sin the primer sequences indicate the targeted mutation to incorporate.

**Supplementary Table 2. Reference set**

| <b>ID</b>   | <b>category</b> | <b>WT</b> | <b>Substitution</b> | <b>Position</b> |
|-------------|-----------------|-----------|---------------------|-----------------|
| G24A        | missense        | G         | A                   | 24              |
| A25G        | missense        | A         | G                   | 25              |
| A27T        | missense        | A         | T                   | 27              |
| T41G        | nonsense        | T         | G                   | 41              |
| C46G        | missense        | C         | G                   | 46              |
| G49A        | missense        | G         | A                   | 49              |
| A60C        | synonymous      | A         | C                   | 60              |
| T68G        | missense        | T         | G                   | 68              |
| A73T        | missense        | A         | T                   | 73              |
| G78A        | synonymous      | G         | A                   | 78              |
| T68A        | missense        | T         | A                   | 78              |
| T82A        | missense        | T         | A                   | 82              |
| G85A        | missense        | G         | A                   | 85              |
| C95G        | missense        | C         | G                   | 95              |
| G106T       | missense        | G         | T                   | 106             |
| A148G       | missense        | A         | G                   | 148             |
| C156G       | synonymous      | C         | G                   | 156             |
| A157C       | missense        | A         | C                   | 157             |
| G70A,G71C   | missense        | G,G       | A,C                 | 70,71           |
| G124T,C125G | missense        | G,C       | T,G                 | 124,125         |
| G124A,C125G | missense        | G,C       | A,G                 | 124,125         |
| G124A,C125A | missense        | G,C       | A,A                 | 124,125         |

**Supplementary Table 3. Validation set**

| <b>ID</b>   | <b>category</b> | <b>WT</b> | <b>Substitution</b> | <b>Position</b> |
|-------------|-----------------|-----------|---------------------|-----------------|
| A14G        | missense        | A         | G                   | 14              |
| T68C        | missense        | T         | C                   | 68              |
| T105A       | missense        | T         | A                   | 105             |
| G133A       | missense        | G         | A                   | 133             |
| C137A       | missense        | C         | A                   | 137             |
| G169A       | missense        | G         | A                   | 169             |
| T175C       | missense        | T         | C                   | 175             |
| A25G,G133A  | missense        | A,G       | G,A                 | 25,133          |
| G133A,T175C | missense        | G,T       | A,C                 | 133,175         |

**Supplementary Table 4.** Coefficients for linear models to predict GFP signals from enrichment scores

| Expression | Intercept<br>$\alpha$ | Sv,o1<br>$\beta$ | Sv,o2_trans<br>$\gamma$ | adj- R2 | p-value |
|------------|-----------------------|------------------|-------------------------|---------|---------|
| Low        | 7.23***               | -0.51***         | 0.52***                 | 0.96    | 5.1e-15 |
| High       | 4.56***               | -2.23***         | -1.64                   | 0.84    | 3.6e-9  |

Significance code  $P < 1e-4$  \*\*\*

**Supplementary Table 5.** Covariance of Enrichment scores Sv,o1 and Sv,o2,trans

| Expression level | Rep1  | Rep2  | Rep3  |
|------------------|-------|-------|-------|
| Low              | -1.48 | -1.95 | -1.85 |
| High             | -0.16 | -0.22 | -0.12 |

**Supplementary Table 6.** Coefficients to map replicates 1 and 3 to replicate2

|      | $\alpha_1$ | $\beta_1$ | $\alpha_3$ | $\beta_3$ |
|------|------------|-----------|------------|-----------|
| Low  | 1.5±0.02   | 0.9±0.02  | 1.3±0.02   | 0.9±0.002 |
| High | 1.7±0.03   | 0.8±0.03  | 0.7±0.04   | 1.1±0.05  |

**Supplementary Table 7.** Configuration states and the energy terms from Ackers' model

| CSi | Occupied OR   | CI (Ni) | dimer | Downstream gene | Total energy ( $\Delta G_{CS}$ )                       |
|-----|---------------|---------|-------|-----------------|--------------------------------------------------------|
| 1   | –             | 0       |       | ON              | 0                                                      |
| 2   | OR3           | 1       |       | ON              | $\Delta G_3$                                           |
| 3   | OR2           | 1       |       | OFF             | $\Delta G_2$                                           |
| 4   | OR1           | 1       |       | OFF             | $\Delta G_1$                                           |
| 5   | OR2, OR3      | 2       |       | OFF             | $\Delta G_2 + \Delta G_3 + \Delta G_{co}$              |
| 6   | OR1, OR2      | 2       |       | OFF             | $\Delta G_1 + \Delta G_2 + \Delta G_{co}$              |
| 7   | OR1, OR3      | 2       |       | OFF             | $\Delta G_1 + \Delta G_3$                              |
| 8   | OR1, OR2, OR3 | 3       |       | OFF             | $\Delta G_1 + \Delta G_2 + \Delta G_3 + \Delta G_{co}$ |

**Supplementary Table 8.** Parameters for CI model, from the literature

|                    |                 |              |
|--------------------|-----------------|--------------|
| $K_a$              | $5 \times 10^7$ | Ackers, 1982 |
| [OR]               | $10^{-9}$ mole  | Ackers, 1982 |
| $\Delta G_1$       | -11.7 kcal      | Ackers, 1982 |
| $\Delta G_2$       | -10.1 kcal      | Ackers, 1982 |
| $\Delta G_3$       | -10.1 kcal      | Ackers, 1982 |
| $\Delta G_{co}$    | -2 kcal         | Ackers, 1982 |
| CI fraction folded | 0.993           | Huang, 1995  |

**Supplementary Table 9.** Parameters estimated for modeling regulatory interaction

|                 |                        |                                     |
|-----------------|------------------------|-------------------------------------|
| $[CI]_{E,low}$  | $5.5 \times 10^{-8} M$ | Calculated based on $GFP_{wt,low}$  |
| $[CI]_{E,high}$ | $8.4 \times 10^{-7} M$ | Calculated based on $GFP_{wt,high}$ |
